# Supplementary material for: High levels of carbonic anhydrase IX in tumour tissue and plasma are biomarkers of poor prognostic in patients with non-small cell lung cancer
Source: PubMed Central journal article supplement (PMC2883156; doi:10.1038/sj.bjc.6605690), 2010-05-11
Supplement: 6605690x5.pdf [file 6605690x5.pdf]

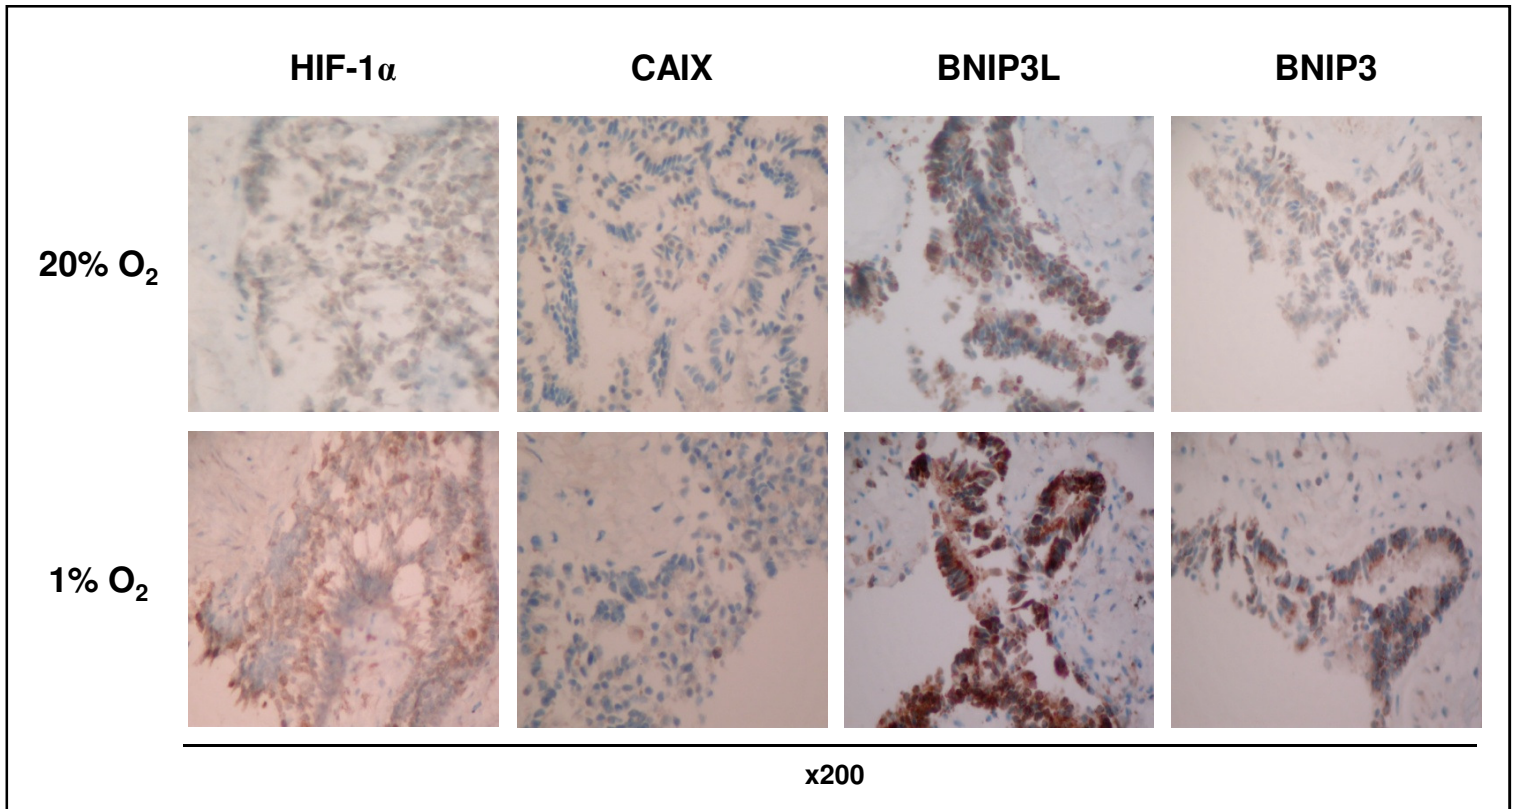

**Figure S5**  
**Ilie et al.**
