# Supplementary material for: High levels of carbonic anhydrase IX in tumour tissue and plasma are biomarkers of poor prognostic in patients with non-small cell lung cancer
Source: PubMed Central journal article supplement (PMC2883156; doi:10.1038/sj.bjc.6605690), 2010-05-11
Supplement: 6605690x6.pdf [file 6605690x6.pdf]

| Variables                          | HIF1- $\alpha$ status |             | P-value |
|------------------------------------|-----------------------|-------------|---------|
|                                    | Low †                 | High †      |         |
| Mean age (y) ‡                     | 65 (39, 85)           | 64 (32, 85) | 0.370   |
| Gender §                           |                       |             |         |
| Male                               | 281 (72)              | 108 (28)    | 0.439   |
| Female                             | 107 (81)              | 25 (19)     |         |
| Smoking status §                   |                       |             |         |
| Never smoked                       | 45 (82)               | 10 (18)     | 0.106   |
| Former or current smokers          | 335 (74)              | 116 (26)    |         |
| Tumor size, median (min, max) cm ‡ | 3.3 (0.2, 16)         | 3.5 (1, 17) | 0.412   |
| Histologic cell type §             |                       |             |         |
| Adenocarcinoma                     | 236 (89)              | 30 (11)     | <0.001* |
| Squamous cell carcinoma            | 116 (67)              | 58 (33)     |         |
| Large cell carcinoma               | 13 (36)               | 23 (64)     |         |
| NOS                                | 22 (51)               | 21 (49)     |         |
| pTNM stage §                       |                       |             |         |
| I                                  | 183 (72)              | 72 (28)     | 0.499   |
| II                                 | 78 (75)               | 26 (25)     |         |
| III                                | 111 (79)              | 30 (21)     |         |
| IV                                 | 16 (76)               | 5 (24)      |         |
| Histologic grade §                 |                       |             |         |
| 1                                  | 151 (82)              | 34 (18)     | 0.0001* |
| 2                                  | 129 (74)              | 45 (26)     |         |
| 3                                  | 91 (73)               | 34 (27)     |         |
| 4                                  | 4 (29)                | 10 (71)     |         |
| Neoadjuvant therapy §              | 59 (88)               | 8 (12)      | 0.203   |

TNM = tumor node metastasis. NOS = not otherwise specified.  
† Values expressed as n (%) or median.  
‡ Mann-Whitney test.  
§  $\chi^2$  test.  
\* P-value significant at the 0.05 level.

**Table S1**

**Ilie et al.**
