# Supplementary material for: High levels of carbonic anhydrase IX in tumour tissue and plasma are biomarkers of poor prognostic in patients with non-small cell lung cancer
Source: PubMed Central journal article supplement (PMC2883156; doi:10.1038/sj.bjc.6605690), 2010-05-11
Supplement: 6605690x7.pdf [file 6605690x7.pdf]

| <b>Cut off</b> | <b>Sensitivity</b> | <b>95% CI</b>      | <b>Specificity</b> | <b>95% CI</b>     | <b>PPV</b>   | <b>NPV</b>   |
|----------------|--------------------|--------------------|--------------------|-------------------|--------------|--------------|
| 0              | 97.13              | 94.9 – 99.4        | 28.07              | 16.4 – 39.7       | 83.19        | 72.27        |
| 5              | 92.34              | 88.7 – 95.9        | 78.94              | 68.4 – 89.5       | 94.14        | 73.77        |
| <b>11</b>      | <b>84.21</b>       | <b>79.3 – 89.2</b> | <b>94.73</b>       | <b>88.9 - 100</b> | <b>98.32</b> | <b>62.07</b> |
| 20             | 67.94              | 61.6 – 74.3        | 100                | 100               | 100          | 45.96        |

CI = confidence interval;  
PPV, positive predictive value; NPV, negative predictive value.  
\* *P*-value significant at the 0.05 level.

**Table S2**

**Ilie et al.**
