# Supplementary material for: High levels of carbonic anhydrase IX in tumour tissue and plasma are biomarkers of poor prognostic in patients with non-small cell lung cancer
Source: PubMed Central journal article supplement (PMC2883156; doi:10.1038/sj.bjc.6605690), 2010-05-11
Supplement: 6605690x9.pdf [file 6605690x9.pdf]

| Variables §            | ELISA CAIX status |          | P-value |
|------------------------|-------------------|----------|---------|
|                        | High              | Low      |         |
| <b>IHC CAIX status</b> |                   |          |         |
| High                   | 13 (10%)          | 2 (1.6%) | 0.919   |
| Low                    | 90 (72%)          | 20 (16%) |         |

§  $\chi^2$  test.

**Table S4**

**Ilie et al.**
